# Supplementary material for: Internal Carotid Artery Tortuosity: Impact on Mechanical Thrombectomy
Source: PubMed Central journal article supplement — Stroke. 2022 Apr 11;53(8):2458–67. doi: 10.1161/STROKEAHA.121.037904 (PMC9311296; doi:10.1161/strokeaha.121.037904), 2022-04-11
Supplement: str-53-2458-s001.pdf [file str-53-2458-s001.pdf]

**SUPPLEMENTAL MATERIAL**

**Internal carotid artery tortuosity: impact on mechanical thrombectomy**

*Table I. The endovascular devices used in the present study*

*Table II. Baseline characteristics according to location of internal carotid artery tortuosity*

*Table III. Influence of extracranial and cavernous internal carotid artery tortuosity on outcomes with non-tortuous group referenced*

*Figure I. Influence of internal carotid artery tortuosity on first pass effect according to the occlusion site*

*Figure II. The distribution of modified Rankin Scale score at 3 months*

**Table I. The endovascular devices used in the present study**

| <b>Devices</b>             | <b>No.</b> | <b>Manufacturer</b>                    |
|----------------------------|------------|----------------------------------------|
| <b>Stent retriever</b>     |            |                                        |
| Solitaire, 6mm             | 65         | Medtronic, California, USA             |
| Solitaire, 4mm             | 73         | Medtronic, California, USA             |
| Trevo, 6mm                 | 17         | Stryker Neurovascular, California, USA |
| Trevo, 4mm                 | 62         | Stryker Neurovascular, California, USA |
| Trevo, 3mm                 | 46         | Stryker Neurovascular, California, USA |
| Embotrap II, 5mm           | 25         | Cerenovus, California, USA             |
| Tron, 6mm                  | 2          | Biomedical Solutions, Tokyo, Japan     |
| Tron, 4mm                  | 16         | Biomedical Solutions, Tokyo, Japan     |
| Tron, 2mm                  | 7          | Biomedical Solutions, Tokyo, Japan     |
| <b>Aspiration catheter</b> |            |                                        |
| JET 7                      | 11         | Penumbra, Inc., California, USA        |
| JET D                      | 2          | Penumbra, Inc., California, USA        |
| ACE68                      | 44         | Penumbra, Inc., California, USA        |
| ACE60                      | 163        | Penumbra, Inc., California, USA        |
| 4MAX                       | 46         | Penumbra, Inc., California, USA        |
| 3MAX                       | 69         | Penumbra, Inc., California, USA        |
| Sofia 6Fr                  | 7          | MicroVeniton, California, USA          |
| Sofia 5Fr                  | 3          | MicroVeniton, California, USA          |
| Catalyst 7                 | 4          | Stryker Neurovascular, California, USA |
| Catalyst 6                 | 15         | Stryker Neurovascular, California, USA |
| React 71                   | 19         | Medtronic, California, USA             |
| React 68                   | 7          | Medtronic, California, USA             |

**Table II. Baseline characteristics according to location of internal carotid artery tortuosity**

|                                  | No tortuosity<br>(n=246) | Extracranial ICA<br>tortuosity<br>(n=35) | Cavernous ICA<br>tortuosity<br>(n=70) | Tortuosity<br>at both sites<br>(n=19) |
|----------------------------------|--------------------------|------------------------------------------|---------------------------------------|---------------------------------------|
| Age, y                           | 77 (70–83)               | 83 (77–87)                               | 78 (72–83)                            | 82 (75–84)                            |
| Female                           | 97 (39)                  | 20 (57)                                  | 37 (53)                               | 13 (68)                               |
| Body weight, kg*                 | 57 (48–64)               | 54 (46–60)                               | 54 (47–65)                            | 53 (46–64)                            |
| Premorbid mRS score              | 0 (0–2)                  | 0 (0–2)                                  | 0 (0–0)                               | 0 (0–3)                               |
| Baseline NIHSS score*            | 18 (13–24)               | 24 (18–29)                               | 19 (13–24)                            | 19 (14–26)                            |
| Admission systolic BP, mmHg      | 152 (134–172)            | 145 (131–180)                            | 151 (134–168)                         | 156 (145–176)                         |
| ASPECTS                          | 8 (6–10)                 | 8 (6–9)                                  | 8 (6–10)                              | 8 (7–10)                              |
| <b>Medical history</b>           |                          |                                          |                                       |                                       |
| Atrial fibrillation <sup>†</sup> | 151 (62)                 | 31 (89)                                  | 48 (69)                               | 17 (90)                               |
| Hypertension*                    | 178 (73)                 | 27 (77)                                  | 47 (67)                               | 16 (84)                               |
| Diabetes mellitus <sup>‡</sup>   | 51 (21)                  | 4 (11)                                   | 17 (25)                               | 6 (32)                                |
| Dyslipidemia*                    | 110 (45)                 | 14 (40)                                  | 35 (50)                               | 9 (47)                                |
| Ischemic heart disease*          | 38 (16)                  | 5 (14)                                   | 8 (11)                                | 3 (16)                                |
| Previous stroke/TIA*             | 54 (22)                  | 6 (17)                                   | 12 (17)                               | 6 (32)                                |
| Current smoking <sup>§</sup>     | 36 (15)                  | 4 (12)                                   | 8 (11)                                | 1 (5)                                 |
| <b>Initial site of occlusion</b> |                          |                                          |                                       |                                       |
| Extracranial ICA                 | 19 (8)                   | 4 (11)                                   | 6 (9)                                 | 0 (0)                                 |
| Intracranial ICA                 | 59 (24)                  | 15 (43)                                  | 13 (19)                               | 12 (63)                               |
| Proximal M1                      | 44 (18)                  | 3 (9)                                    | 17 (24)                               | 1 (5)                                 |

|                                              |               |               |               |              |
|----------------------------------------------|---------------|---------------|---------------|--------------|
| Distal M1                                    | 66 (27)       | 7 (20)        | 17 (24)       | 2 (11)       |
| M2                                           | 58 (24)       | 6 (17)        | 17 (24)       | 4 (21)       |
| <b>First-line MT strategy</b>                |               |               |               |              |
| SR                                           | 81 (33)       | 9 (26)        | 23 (33)       | 7 (37)       |
| CA                                           | 92 (37)       | 10 (29)       | 25 (36)       | 5 (26)       |
| Combined SR and CA                           | 60 (24)       | 14 (40)       | 16 (23)       | 6 (32)       |
| Manual aspiration through the guide catheter | 2 (1)         | 0 (0)         | 2 (3)         | 0 (0)        |
| Attempt only                                 | 11 (5)        | 2 (6)         | 4 (6)         | 1 (5)        |
| Onset to hospital arrival time, min          | 108 (49–326)  | 82 (51–285)   | 63 (41–238)   | 54 (39–253)  |
| Onset to puncture time, min                  | 190 (115–419) | 163 (109–342) | 167 (108–298) | 129 (93–335) |
| Intravenous thrombolysis                     | 107 (44)      | 13 (37)       | 37 (53)       | 12 (63)      |

Data are presented as medians (interquartile range) or n (%).

\*1 missing value (1 in the non-tortuous group).

†2 missing values (2 in the non-tortuous group).

‡3 missing values (2 in the non-tortuous group and 1 in the cavernous ICA tortuosity group).

§2 missing values (1 in the non-tortuous group and 1 in the extracranial ICA tortuosity group).

Abbreviations: ICA, internal carotid artery; mRS, modified Rankin Scale; NIHSS, National Institute of Health Stroke Scale; BP, blood pressure; ASPECTS, Alberta Stroke Program Early Computed Tomographic Score; TIA, transient ischemic attack; M1, first segment of the middle cerebral artery; M2, second segment of the middle cerebral artery; MT, mechanical thrombectomy; SR, stent retriever; CA, contact aspiration.

**Table III. Influence of extracranial and cavernous internal carotid artery tortuosity on outcomes with non-tortuous group referenced**

|                                          | <b>Extracranial ICA<br/>tortuosity<br/>(n=35)</b> | <b>Cavernous ICA<br/>tortuosity<br/>(n=70)</b> | <b>Extracranial ICA<br/>tortuosity vs.<br/>No tortuosity<br/>Adjusted OR*<br/>(95%CI)</b> | <b>Cavernous ICA<br/>tortuosity vs.<br/>No tortuosity<br/>Adjusted OR†<br/>(95%CI)</b> |
|------------------------------------------|---------------------------------------------------|------------------------------------------------|-------------------------------------------------------------------------------------------|----------------------------------------------------------------------------------------|
| <b>Procedural outcomes‡</b>              |                                                   |                                                |                                                                                           |                                                                                        |
| First pass effect <sup>  </sup>          | 6 (18)                                            | 17 (26)                                        | 0.37 (0.14–0.96)                                                                          | 0.63 (0.34–1.19)                                                                       |
| Modified first pass effect <sup>  </sup> | 9 (27)                                            | 34 (52)                                        | 0.31 (0.13–0.72)                                                                          | 1.01 (0.57–1.78)                                                                       |
| Final eTICI 2c/3                         | 18 (51)                                           | 29 (41)                                        | 0.80 (0.38–1.70)                                                                          | 0.54 (0.31–0.94)                                                                       |
| Final eTICI 2b/3                         | 30 (86)                                           | 61 (87)                                        | 1.23 (0.43–3.56)                                                                          | 1.36 (0.61–3.03)                                                                       |
| Procedural complications                 | 2 (6)                                             | 4 (6)                                          | 0.93 (0.17–5.16)                                                                          | 0.95 (0.28–3.18)                                                                       |
| <b>Clinical outcomes‡</b>                |                                                   |                                                |                                                                                           |                                                                                        |
| Favorable outcome                        | 14 (40)                                           | 36 (51)                                        | 1.25 (0.49–3.17)                                                                          | 1.10 (0.57–2.10)                                                                       |
| Excellent outcome                        | 9 (26)                                            | 21 (30)                                        | 1.16 (0.42–3.20)                                                                          | 0.75 (0.38–1.45)                                                                       |
| Poor outcome                             | 10 (29)                                           | 8 (11)                                         | 1.25 (0.48–3.26)                                                                          | 0.79 (0.32–1.92)                                                                       |
| Neurological improvement at 7 days       | 20 (57)                                           | 35 (51)                                        | 0.67 (0.31–1.47)                                                                          | 0.55 (0.31–0.98)                                                                       |
| <b>Safety outcomes§</b>                  |                                                   |                                                |                                                                                           |                                                                                        |
| Any ICH                                  | 18 (51)                                           | 39 (56)                                        | 1.47 (0.70–3.09)                                                                          | 1.68 (0.97–2.92)                                                                       |
| SAH                                      | 8 (23)                                            | 20 (29)                                        | 1.52 (0.62–3.76)                                                                          | 1.96 (1.03–3.71)                                                                       |
| Parenchymal hematoma                     | 2 (6)                                             | 8 (11)                                         | 1.27 (0.25–6.42)                                                                          | 2.65 (0.98–7.21)                                                                       |
| Symptomatic ICH                          | 0 (0)                                             | 5 (7)                                          | –                                                                                         | 3.35 (0.84–13.39)                                                                      |

Data are presented as n (%).

\*ORs with 95% CIs for the extracranial ICA tortuous group were calculated using the non-tortuous group as reference.

†ORs with 95% CIs for the cavernous ICA tortuous group were calculated using the non-tortuous group as reference.

‡Models for procedural and clinical outcomes adjust for age, sex, body weight, premorbid mRS score, baseline NIHSS score, occlusion site, first-line MT strategy, and onset to puncture time.

§Models for safety outcomes adjust for age, sex, body weight, baseline NIHSS score, occlusion site, intravenous thrombolysis, first-line MT strategy, and onset to puncture time.

||First pass effect and modified first pass effect were assessed in 33 patients of the tortuous group and 66 patients of the non-tortuous group.

Abbreviations: ICA, internal carotid artery; OR, odds ratio; CI, confidence interval; eTICI, extended Thrombolysis In Cerebral Infarction; ICH, intracranial hemorrhage; SAH, subarachnoid hemorrhage; mRS, modified Rankin Scale; NIHSS, National Institute of Health Stroke Scale; MT, mechanical thrombectomy.

**Figure I. Influence of internal carotid artery tortuosity on first pass effect according to the occlusion site**

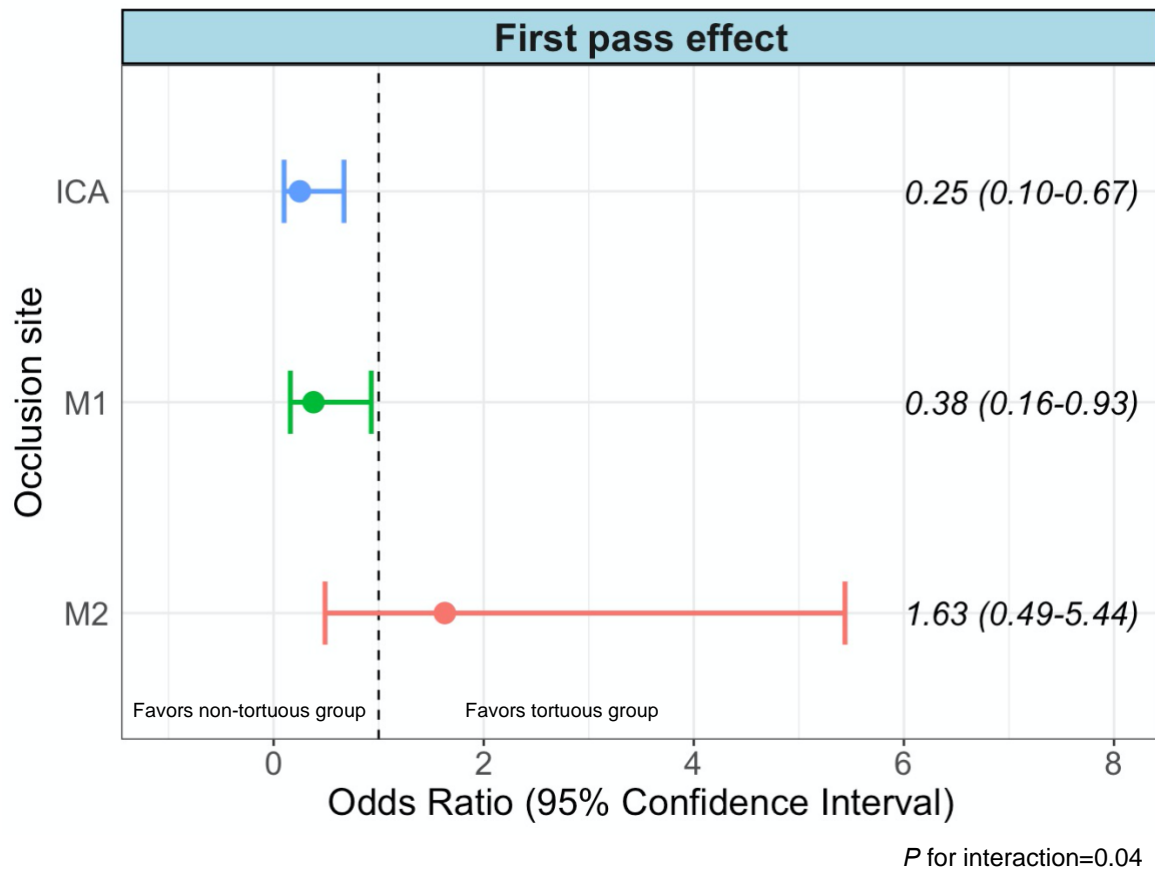

Forest plot summarizes the odds ratio obtained for comparison of the tortuous and non-tortuous groups on first pass effect according to each occlusion site.

Abbreviations: ICA, internal carotid artery; M1, first segment of the middle cerebral artery; M2, second segment of the middle cerebral artery.



**Figure II. The distribution of modified Rankin Scale score at 3 months**

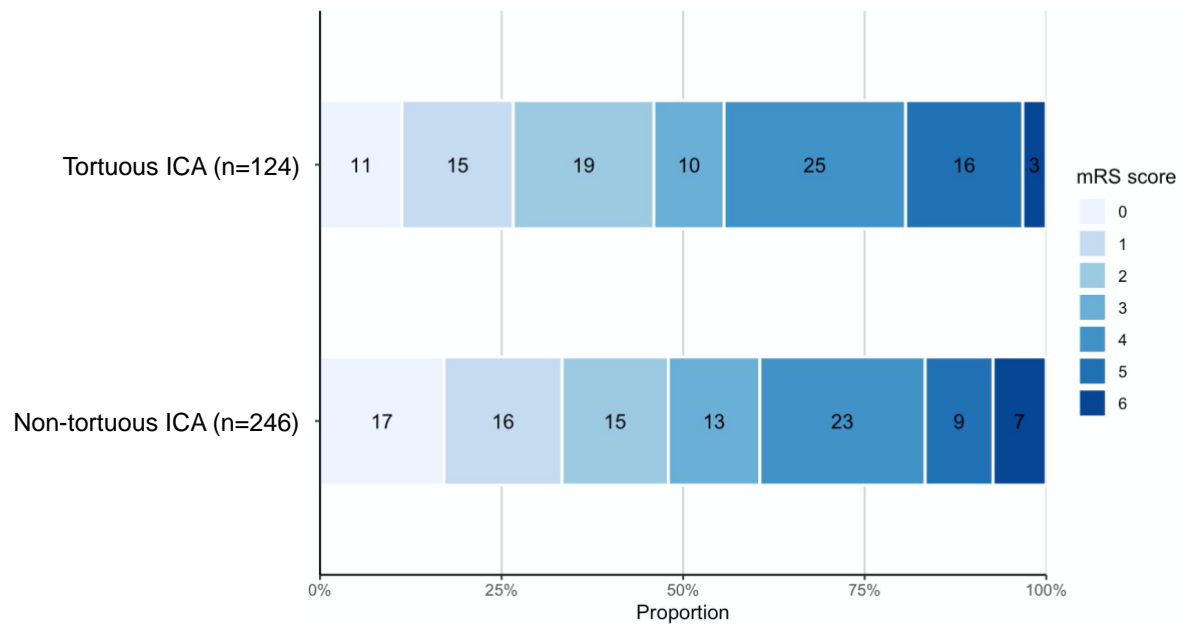

Abbreviations: mRS, modified Rankin Scale.
